# Supplementary material for: Zds1/Zds2–PP2ACdc55 complex specifies signaling output from Rho1 GTPase
Source: PubMed Central journal article supplement — J Cell Biol. 2016 Jan 4;212(1):51–61. doi: 10.1083/jcb.201508119 (PMC4700482; doi:10.1083/jcb.201508119), 2016-01-04
Supplement: JCB_201508119_sm.pdf [file JCB_201508119_sm.pdf]

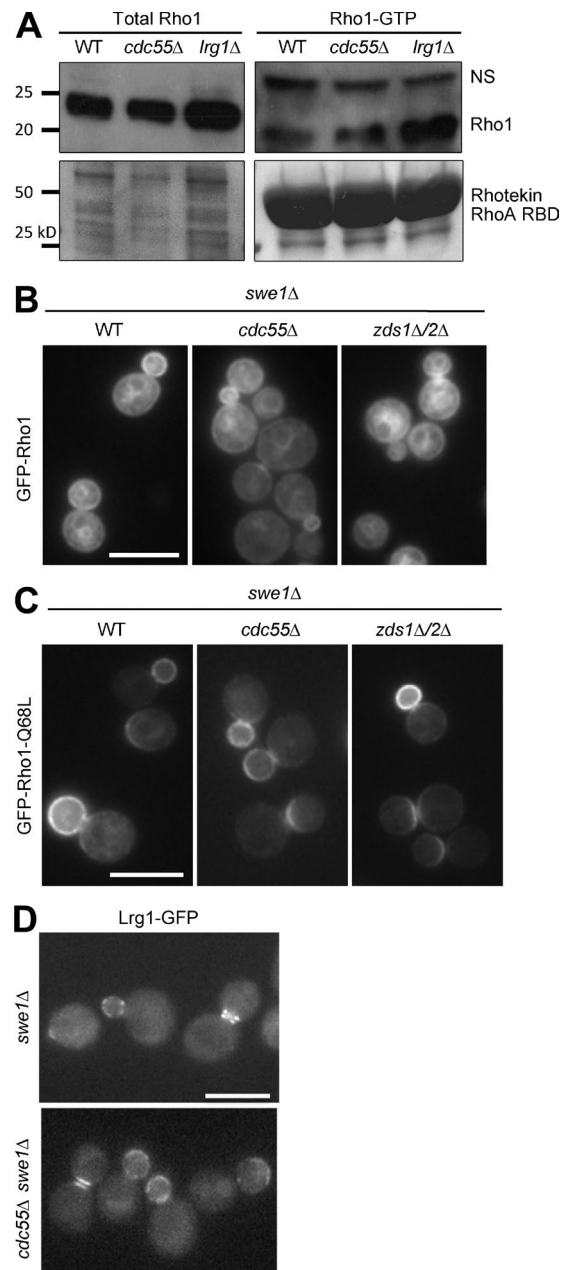

Figure S1. **Activity and localization of Rho1 was not significantly affected in PP2A mutants, associated with Fig. 3.** (A) Rho1 activity was does not appear to be significantly affected by loss of *CDC55*. The total cellular amount of active Rho1 (Rho1-GTP) was analyzed in the indicated strains by a previously established pull-down assay for active RhoA/Rho1 using GST-rhotekin RhoA binding domain (RBD) beads (Kimura et al., 2000; Kono et al., 2008; Yoshida et al., 2009). Rho1 was detected by Western blot analysis using a custom-made rabbit anti-Rho1 antibody (Y1486). Ponceau staining is shown as a loading control for GST-rhotekin RBD. (B and C) Rho1 is localized to the bud cortex in the absence of PP2A subunits. GFP-Rho1 (B) and GFP-Rho1 Q68L (C) were expressed under the *RHO1* promoter from the centromeric plasmids, and images were taken in living cells at RT. Note that these experiments were performed in a *swe1Δ* background. Bars, 5  $\mu$ m. (D) Bud tip and bud neck localization of Lrg1 was not detectably affected by deletion of *CDC55*. In *swe1Δ* strains, Lrg1-GFP was expressed at the endogenous locus, and live cells were imaged at RT. WT, wild type.

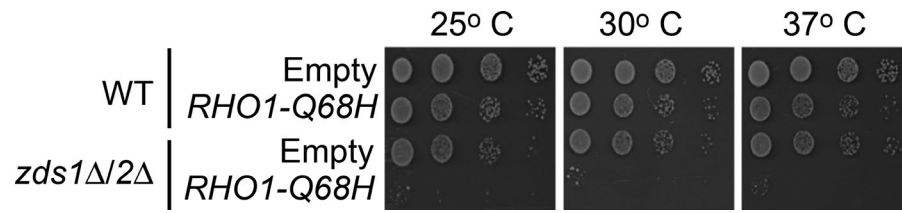

Figure S2. *zds1Δ zds2Δ* cells are sensitive to expression of active Rho1, associated with Fig. 4. Serial dilutions of yeast strains expressing *RHO1-Q68H* (active Rho1) under the control of the *RHO1* promoter were spotted on SC-URA plates and grown at different temperatures for 3 d before the plates were imaged. WT, wild type.

Table S1. Yeast strains used in this study

| Strain  | Genotype                                                                                         | Source                            |
|---------|--------------------------------------------------------------------------------------------------|-----------------------------------|
| PY3295  | <i>MATa his3Δ1 leu2Δ0 ura3Δ0 met15Δ0</i>                                                         | Open Biosystems                   |
| PY3296  | <i>MATα his3Δ1 leu2Δ0 ura3Δ0 lys2Δ0</i>                                                          | Open Biosystems                   |
| SY1327  | <i>MATa rom1Δ::KanMX6 rom2Δ::KanMX6 tus1Δ::KanMX6 + &lt;CEN-ROM2-URA3&gt;</i>                    | Yoshida et al., 2009              |
| SY1854  | <i>MATa zds1::HIS3MX6::pGAL<sub>1</sub>-3xHA-ZDS1-GFP::KanMX6</i>                                | This study                        |
| VR334   | <i>MATa cdc55::CDC55-13xMyc::KanMX6</i>                                                          | This study                        |
| VR371   | <i>MATa cdc55::CDC55-13xMyc::KanMX6 zds1::KanMX6 zds2::HIS3MX6</i>                               | This study                        |
| YSY4    | <i>MATα ade2 his3 leu2 lys2 trp1 ura3 rho1Δ::HIS3 ade3::RHO1::LEU2 (YOC764)</i>                  | Saka et al., 2001                 |
| YSY6    | <i>MATα ade2 his3 leu2 lys2 trp1 ura3 rho1::LYS2 ade3::rho1-2::HIS3 (YOC729)</i>                 | Saka et al., 2001                 |
| YSY74   | <i>MATa cdc55Δ::KanMX6</i>                                                                       | Rossio and Yoshida, 2011          |
| SY1763  | <i>MATa zds1Δ::KanMX6 zds2Δ::HIS3MX6</i>                                                         | Rossio and Yoshida, 2011          |
| VR368   | <i>MATα pph21Δ::KanMX6</i>                                                                       | Open Biosystems                   |
| VR406   | <i>MATα pph22Δ::KanMX6</i>                                                                       | Open Biosystems                   |
| VR408   | <i>MATα pph21Δ::KanMX6 pph22Δ::KanMX6</i>                                                        | This study                        |
| VR403   | <i>MATα sit4Δ::KanMX6</i>                                                                        | Open Biosystems                   |
| SY1529  | <i>MATa lrg1Δ::KanMX6</i>                                                                        | Yoshida et al., 2009              |
| SY1390  | <i>MATa swe1Δ::LEU2</i>                                                                          | Rossio and Yoshida, 2011          |
| YSY71   | <i>MATa swe1Δ::LEU2 cdc55Δ::KanMX6</i>                                                           | Rossio and Yoshida, 2011          |
| YSY80   | <i>MATa swe1Δ::LEU2 zds1Δ::KanMX6 zds2Δ::HIS3MX6</i>                                             | Rossio and Yoshida, 2011          |
| SY1630  | <i>MATa zds1::ZDS1-GFP::HIS3MX6</i>                                                              | Rossio and Yoshida, 2011          |
| VR63    | <i>MATa zds1::ZDS1-GFP::HIS3MX6 zds2Δ::HIS3MX6</i>                                               | Rossio and Yoshida, 2011          |
| SY1856  | <i>MATa zds1::Zds1ΔC400-GFP::HIS3MX6</i>                                                         | Rossio and Yoshida, 2011          |
| VR58    | <i>MATa zds1::Zds1ΔC400-GFP::HIS3MX6 zds2Δ::HIS3MX6</i>                                          | Rossio and Yoshida, 2011          |
| SY1857  | <i>MATa zds1::Zds1ΔC800-GFP::HIS3MX6</i>                                                         | Rossio and Yoshida, 2011          |
| VR60    | <i>MATa zds1::Zds1ΔC800-GFP::HIS3MX6 zds2Δ::HIS3MX6</i>                                          | Rossio and Yoshida, 2011          |
| SY1779  | <i>MATa cdc55::CDC55-GFP::HIS3MX6</i>                                                            | Rossio and Yoshida, 2011          |
| SY1811  | <i>MATa cdc55::Cdc55-GFP-NES::KanMX6</i>                                                         | Rossio and Yoshida, 2011          |
| SY1808  | <i>MATa cdc55::Cdc55-GFP-NLS::KanMX6</i>                                                         | Rossio and Yoshida, 2011          |
| SY1793  | <i>MATa cdc55::CDC55-GFP::HIS3MX6 zds1::KanMX6 zds2Δ::HIS3MX6</i>                                | Rossio and Yoshida, 2011          |
| VR21    | <i>MATa cdc55::Cdc55-GFP-NES::KanMX6 zds1::KanMX6 zds2Δ::HIS3MX6</i>                             | Rossio and Yoshida, 2011          |
| YPH499  | <i>MATa ade2 his3 leu2 lys2 trp1 ura3</i>                                                        | Sikorski and Hieter, 1989         |
| YOC2581 | <i>MATa ade2 his3 leu2 lys2 trp1 ura3 zds1Δ::cgHIS3</i>                                          | Sekiya-Kawasaki et al., 2002      |
| SY1762  | <i>MATa ade2 his3 leu2 lys2 trp1 ura3 zds1Δ::cgHIS3 zds2Δ::KanMX6</i>                            | This study                        |
| YSY123  | <i>MATa mpk1Δ::KanMX6</i>                                                                        | This study                        |
| VR160   | <i>MATa mpk1Δ::KanMX6 cdc55Δ::KanMX6</i>                                                         | This study                        |
| VR194   | <i>MATa mpk1Δ::KanMX6 zds1Δ::KanMX6 zds2Δ::HIS3MX6</i>                                           | This study                        |
| YSY83   | <i>MATa swe1Δ::LEU2 lrg1::LRG1-3xHA::HIS3MX6</i>                                                 | This study                        |
| YSY85   | <i>MATa swe1Δ::LEU2 cdc55Δ::KanMX6 lrg1::LRG1-3xHA::HIS3MX6</i>                                  | This study                        |
| YEJ56   | <i>MATa lrg1::pGAL<sub>1</sub>-3xHA-LRG1::HIS3MX6</i>                                            | This study                        |
| YEJ96   | <i>MATa cdc55Δ::KanMX6 lrg1::pGAL<sub>1</sub>-3xHA-LRG1::HIS3MX6</i>                             | This study                        |
| YEJ968  | <i>MATa swe1Δ::LEU2 cdc55Δ::HIS3MX6</i>                                                          | This study                        |
| YEJ972  | <i>MATa swe1Δ::LEU2 cdc55Δ::HIS3MX6 lrg1Δ::KanMX6</i>                                            | This study                        |
| YEJ900  | <i>MATa swe1Δ::LEU2 sac7::SAC7-3xHA::HIS3MX6</i>                                                 | This study                        |
| YEJ904  | <i>MATa swe1Δ::LEU2 cdc55Δ::KanMX6 sac7::SAC7-3xHA::HIS3MX6</i>                                  | This study                        |
| YEJ163  | <i>MATα his3Δ200 leu2Δ1 ura3-52 cim3-1,ts (CMY763)</i>                                           | Ghislain et al., 1993             |
| YEJ815  | <i>MATa CIM3 sac7::SAC7-3xHA::HIS3MX6</i>                                                        | This study                        |
| YEJ803  | <i>MATa CIM3 cdc55Δ::KanMX6 sac7::SAC7-3xHA::HIS3MX6</i>                                         | This study                        |
| YEJ811  | <i>MATa cim3-1,ts sac7::SAC7-3xHA::HIS3MX6</i>                                                   | This study                        |
| YEJ807  | <i>MATa cim3-1,ts cdc55Δ::KanMX6 sac7::SAC7-3xHA::HIS3MX6</i>                                    | This study                        |
| YSY186  | <i>MATa ade2 his3 leu2 lys2 trp1 ura3 fks1Δ::HIS3 fks2Δ::LYS2 ade3::fks1-1154::TRP (YOC1087)</i> | Sekiya-Kawasaki et al., 2002      |
| YSY124  | <i>MATα leu2-3,112 ura3-52 trp1-1 his4 can1' pkc1ΔLEU2 &lt;YCP50-pkc1-2,ts&gt;</i>               | Levin and Bartlett-Heubusch, 1992 |
| SY1895  | <i>MATa swe1Δ::LEU2 lrg1::LRG1-GFP::HIS3MX6</i>                                                  | This study                        |
| SY1897  | <i>MATa swe1Δ::LEU2 cdc55Δ::KanMX6 lrg1::LRG1-GFP::HIS3MX6</i>                                   | This study                        |
| SY1806  | <i>MATa sac7Δ::HIS3MX6</i>                                                                       | Yoshida et al., 2009              |

Unless otherwise indicated, all yeast strains used in this study were isogenic or congenic to BY4741 named PY 3295 or BY4742 named PY 3296.

Table S2. Plasmids used in this study

| Plasmid       | Gene                               | Marker and vector type             | Source                |
|---------------|------------------------------------|------------------------------------|-----------------------|
| PB2308        | <i>ROM2</i>                        | URA3, CEN                          | Yoshida et al., 2009  |
| pGEX4T-1      | GST                                | Amp <sup>R</sup>                   | NA                    |
| pSY371        | GST-Rho1-Q68L                      | Amp <sup>R</sup>                   | This study            |
| pSY372        | <i>ZDS1-GFP</i>                    | NA                                 | This study            |
| pSY373        | <i>CDC55-GFP</i>                   | NA                                 | This study            |
| pSY374        | <i>ZDS1</i>                        | URA3, <i>leu2Δ</i> , 2μ (gTOW6000) | Makanae et al., 2013  |
| pSY65         | <i>GFP-RHO1</i>                    | URA3, CEN                          | Yoshida et al., 2009  |
| pSY63         | <i>GFP-Rho1-Q68L</i>               | URA3, CEN                          | Yoshida et al., 2009  |
| PB1561        | <i>RHO1-Q68H</i>                   | URA3, CEN                          | Yoshida et al., 2009  |
| PB1544        | <i>PKC1-R398P</i>                  | URA3, CEN                          | BYP5216 (YGRC)        |
| VR11          | <i>CDC55</i>                       | URA3, 2μ                           | This study            |
| pSY375        | <i>pGAL<sub>1</sub>-6xHis-SAC7</i> | URA3, 2μ                           | This study            |
| PB1354        | <i>pGAL<sub>1</sub>-PKC1-R398P</i> | NA                                 | Kono et al., 2012     |
| pNV7-MKK1P386 | <i>pGAL<sub>1</sub>-MKK1-S386P</i> | URA3, Yep (pAT597)                 | Watanabe et al., 1995 |
| PB1543        | <i>PKC1</i>                        | URA3, 2μ                           | This study            |

## References

- Ghislain, M., A. Udvardy, and C. Mann. 1993. *S. cerevisiae* 26S protease mutants arrest cell division in G2/metaphase. *Nature*. 366:358–362. <http://dx.doi.org/10.1038/366358a0>
- Kimura, K., T. Tsuji, Y. Takada, T. Miki, and S. Narumiya. 2000. Accumulation of GTP-bound RhoA during cytokinesis and a critical role of ECT2 in this accumulation. *J. Biol. Chem.* 275:17233–17236. <http://dx.doi.org/10.1074/jbc.C000212200>
- Kono, K., S. Nogami, M. Abe, M. Nishizawa, S. Morishita, D. Pellman, and Y. Ohya. 2008. G1/S cyclin-dependent kinase regulates small GTPase Rho1p through phosphorylation of RhoGEF Tus1p in *Saccharomyces cerevisiae*. *Mol. Biol. Cell.* 19:1763–1771. <http://dx.doi.org/10.1091/mbc.E07-09-0950>
- Kono, K., Y. Saeki, S. Yoshida, K. Tanaka, and D. Pellman. 2012. Proteasomal degradation resolves competition between cell polarization and cellular wound healing. *Cell*. 150:151–164. <http://dx.doi.org/10.1016/j.cell.2012.05.030>
- Levin, D.E., and E. Bartlett-Heubusch. 1992. Mutants in the *S. cerevisiae* PKC1 gene display a cell cycle-specific osmotic stability defect. *J. Cell Biol.* 116:1221–1229. <http://dx.doi.org/10.1083/jcb.116.5.1221>
- Makanae, K., R. Kintaka, T. Makino, H. Kitano, and H. Moriya. 2013. Identification of dosage-sensitive genes in *Saccharomyces cerevisiae* using the genetic tug-of-war method. *Genome Res.* 23:300–311. <http://dx.doi.org/10.1101/gr.146662.112>
- Rossio, V., and S. Yoshida. 2011. Spatial regulation of Cdc55-PP2A by Zds1/Zds2 controls mitotic entry and mitotic exit in budding yeast. *J. Cell Biol.* 193:445–454. <http://dx.doi.org/10.1083/jcb.201101134>
- Saka, A., M. Abe, H. Okano, M. Minemura, H. Qadota, T. Utsugi, A. Mino, K. Tanaka, Y. Takai, and Y. Ohya. 2001. Complementing yeast rho1 mutation groups with distinct functional defects. *J. Biol. Chem.* 276:46165–46171. <http://dx.doi.org/10.1074/jbc.M103805200>
- Sekiya-Kawasaki, M., M. Abe, A. Saka, D. Watanabe, K. Kono, M. Minemura-Asakawa, S. Ishihara, T. Watanabe, and Y. Ohya. 2002. Dissection of upstream regulatory components of the Rho1p effector, 1,3-beta-glucan synthase, in *Saccharomyces cerevisiae*. *Genetics*. 162:663–676.
- Sikorski, R.S., and P. Hieter. 1989. A system of shuttle vectors and yeast host strains designed for efficient manipulation of DNA in *Saccharomyces cerevisiae*. *Genetics*. 122:19–27.
- Watanabe, Y., K. Irie, and K. Matsumoto. 1995. Yeast RLM1 encodes a serum response factor-like protein that may function downstream of the Mpk1 (Slt2) mitogen-activated protein kinase pathway. *Mol. Cell. Biol.* 15:5740–5749. <http://dx.doi.org/10.1128/MCB.15.10.5740>
- Yoshida, S., S. Bartolini, and D. Pellman. 2009. Mechanisms for concentrating Rho1 during cytokinesis. *Genes Dev.* 23:810–823. <http://dx.doi.org/10.1101/gad.1785209>
